# Supplementary material
Source: PubMed Central journal article supplement (PMC4806775)
Supplement: supp_dc15-2080v152080_DC152080SupplementaryData.pdf [file supp_dc15-2080v152080_DC152080SupplementaryData.pdf]

SUPPLEMENTARY DATA

**Supplementary Table 1. Effect sizes, risk allele frequencies, and proportion missing of 38 T2D-related Single Nucleotide Polymorphisms by ethnicity in the Third National Health and Nutrition Examination Survey DNA Bank (NHANES III, 1991-1994)**

| SNP        | Chr | Position (Hg19) | Risk allele | Other allele | Odds ratio | Closest gene        | Risk Allele Frequency (%) |      |      |      | Missing (%) |     |      |      |
|------------|-----|-----------------|-------------|--------------|------------|---------------------|---------------------------|------|------|------|-------------|-----|------|------|
|            |     |                 |             |              |            |                     | All                       | NHW  | NHB  | MA   | All         | NHW | NHB  | MA   |
| rs10203174 | 2   | 43543534        | C           | T            | 1.11       | <i>THADA</i>        | 82.5                      | 89.0 | 65.8 | 91.2 | 4.1         | 3.5 | 5.4  | 3.7  |
| rs10811661 | 9   | 22124094        | T           | C            | 1.21       | <i>CDKN2A/B</i>     | 87.4                      | 82.8 | 93.2 | 87.4 | 1.8         | 2.3 | 1.5  | 1.5  |
| rs10830963 | 11  | 92348358        | G           | C            | 1.09       | <i>MTNR1B</i>       | 19.9                      | 20.0 | 19.8 | 20.0 | 0.8         | 0.8 | 1.0  | 0.6  |
| rs10842994 | 12  | 27856417        | C           | T            | 1.08       | <i>KLHDC5</i>       | 85.9                      | 85.6 | 86.8 | 85.4 | 1.0         | 1.4 | 0.9  | 0.5  |
| rs11063069 | 12  | 4244634         | G           | A            | 1.08       | <i>CCND2</i>        | 17.4                      | 20.8 | 19.1 | 11.4 | 3.4         | 2.6 | 5.3  | 2.3  |
| rs1111875  | 10  | 94452862        | C           | T            | 1.12       | <i>HHEX/IDE</i>     | 66.7                      | 59.8 | 78.5 | 63.4 | 1.7         | 2.1 | 1.4  | 1.6  |
| rs11634397 | 17  | 36102381        | A           | G            | 1.10       | <i>ZAND6</i>        | 48.9                      | 48.0 | 61.0 | 37.6 | 3.2         | 2.7 | 5.2  | 1.8  |
| rs11717195 | 3   | 124548468       | A           | G            | 1.10       | <i>ADCY5</i>        | 78.8                      | 78.5 | 78.4 | 79.6 | 0.9         | 1.0 | 1.0  | 0.6  |
| rs12427353 | 12  | 119911284       | G           | C            | 1.11       | <i>HNF1A (TCF1)</i> | 88.1                      | 80.8 | 96.5 | 88.9 | 2.9         | 2.4 | 4.8  | 1.6  |
| rs12571751 | 10  | 80612637        | A           | G            | 1.09       | <i>ZMIZ1</i>        | 52.8                      | 53.6 | 53.4 | 51.1 | 5.6         | 5.4 | 6.4  | 5.1  |
| rs12779790 | 10  | 12368016        | G           | A            | 1.09       | <i>VPS26A</i>       | 16.9                      | 17.2 | 14.0 | 19.5 | 3.3         | 2.7 | 4.8  | 2.5  |
| rs12899811 | 15  | 89345080        | G           | A            | 1.08       | <i>PRC1</i>         | 51.4                      | 32.4 | 63.1 | 63.6 | 3.4         | 2.7 | 5.3  | 2.2  |
| rs12970134 | 18  | 56035730        | A           | G            | 1.08       | <i>MC4R</i>         | 19.4                      | 27.5 | 13.8 | 14.8 | 3.5         | 2.9 | 5.5  | 2.3  |
| rs13266634 | 8   | 118253964       | C           | T            | 1.14       | <i>SLC30A8</i>      | 76.7                      | 68.8 | 90.1 | 73.2 | 1.0         | 1.0 | 1.0  | 1.1  |
| rs1552224  | 11  | 72110746        | A           | C            | 1.10       | <i>CENTD2</i>       | 91.2                      | 85.6 | 96.7 | 92.8 | 2.6         | 2.2 | 4.0  | 1.8  |
| rs163184   | 11  | 2803645         | G           | T            | 1.11       | <i>KCNQ1</i>        | 37.8                      | 47.7 | 18.4 | 44.8 | 4.3         | 3.8 | 5.1  | 4.2  |
| rs17168486 | 7   | 14864807        | T           | C            | 1.08       | <i>DGKB</i>         | 23.3                      | 16.9 | 9.4  | 45.4 | 3.7         | 2.9 | 5.4  | 3.0  |
| rs1801282  | 3   | 12368125        | C           | G            | 1.14       | <i>PPARG</i>        | 9.6                       | 13.1 | 2.3  | 12.6 | 0.5         | 0.5 | 0.6  | 0.4  |
| rs2261181  | 12  | 64498585        | T           | C            | 1.11       | <i>HMG2</i>         | 13.0                      | 9.7  | 21.8 | 8.3  | 5.5         | 4.9 | 8.2  | 3.6  |
| rs2334499  | 11  | 1653425         | T           | C            | 1.05       | <i>DUSP8</i>        | 35.4                      | 41.3 | 15.5 | 48.2 | 6.2         | 5.8 | 6.5  | 6.5  |
| rs243021   | 2   | 60438323        | A           | G            | 1.07       | <i>BCL11A</i>       | 46.8                      | 46.8 | 37.8 | 56.0 | 2.4         | 1.9 | 4.0  | 1.4  |
| rs2908282  | 7   | 44215353        | A           | G            | 1.04       | <i>YKT6</i>         | 23.2                      | 17.7 | 21.3 | 32.2 | 1.6         | 1.4 | 1.7  | 1.6  |
| rs2943640  | 2   | 226801829       | C           | A            | 1.09       | <i>IRS1</i>         | 78.4                      | 65.0 | 90.7 | 83.0 | 3.6         | 3.2 | 5.2  | 2.6  |
| rs340874   | 1   | 212225879       | C           | T            | 1.07       | <i>PROX1</i>        | 38.4                      | 52.1 | 19.1 | 40.7 | 1.4         | 1.6 | 1.5  | 1.2  |
| rs459193   | 5   | 55842508        | G           | A            | 1.05       | <i>ANKRD55</i>      | 69.4                      | 75.0 | 57.8 | 74.0 | 4.0         | 3.7 | 4.9  | 3.6  |
| rs5215     | 11  | 17365206        | C           | T            | 1.09       | <i>KCNJ11</i>       | 28.8                      | 36.2 | 8.8  | 39.7 | 0.3         | 0.5 | 0.2  | 0.1  |
| rs6795735  | 3   | 64680405        | C           | T            | 1.05       | <i>ADAMTS9</i>      | 35.5                      | 57.1 | 18.1 | 25.8 | 5.8         | 5.1 | 7.5  | 4.9  |
| rs6878122  | 5   | 76463067        | G           | A            | 1.08       | <i>ZBED3</i>        | 28.0                      | 32.2 | 15.7 | 35.0 | 2.8         | 2.1 | 4.8  | 1.6  |
| rs7034200  | 9   | 4279050         | A           | C            | 1.06       | <i>GLIS3</i>        | 55.9                      | 55.4 | 57.0 | 55.5 | 1.1         | 1.1 | 1.3  | 0.9  |
| rs7177055  | 15  | 75619817        | A           | G            | 1.09       | <i>HMG20A</i>       | 59.3                      | 71.3 | 38.9 | 64.8 | 2.9         | 2.2 | 5.0  | 1.7  |
| rs7202877  | 16  | 73804746        | T           | G            | 1.08       | <i>BCAR1</i>        | 88.7                      | 90.0 | 82.5 | 93.4 | 3.3         | 2.6 | 5.3  | 2.3  |
| rs7593730  | 2   | 160879700       | C           | T            | 1.06       | <i>RBMS1</i>        | 76.7                      | 79.5 | 64.4 | 85.5 | 2.4         | 1.9 | 4.0  | 1.5  |
| rs7756992  | 6   | 20787688        | G           | A            | 1.15       | <i>CDKAL1</i>       | 36.7                      | 26.0 | 57.0 | 29.7 | 9.6         | 8.2 | 11.3 | 9.6  |
| rs780094   | 2   | 27594741        | C           | T            | 1.06       | <i>GCKR</i>         | 67.2                      | 66.6 | 67.2 | 67.9 | 0.9         | 1.0 | 1.0  | 0.6  |
| rs7903146  | 10  | 114748339       | T           | C            | 1.33       | <i>TCF7L2</i>       | 26.4                      | 25.7 | 26.7 | 26.8 | 1.1         | 1.5 | 1.0  | 0.7  |
| rs7961581  | 12  | 69949369        | C           | T            | 1.06       | <i>TSPAN8</i>       | 22.1                      | 27.3 | 20.5 | 17.1 | 8.2         | 8.1 | 4.6  | 12.2 |
| rs849135   | 7   | 28162938        | G           | A            | 1.10       | <i>JAZF1</i>        | 62.6                      | 50.8 | 74.8 | 65.1 | 4.2         | 3.8 | 5.2  | 3.7  |
| rs9939609  | 16  | 52378028        | A           | T            | 1.10       | <i>FTO</i>          | 37.7                      | 40.0 | 47.0 | 25.4 | 4.5         | 4.5 | 5.0  | 4.0  |

NHW: Non-Hispanic Whites; NHB: Non-Hispanic Blacks; MA: Mexican Americans. Chr: chromosome; Transethnic effect sizes were odds ratios obtained from a meta-analysis of genome wide association studies on type 2 diabetes by Maharajan et al (DIAGRAM version 4).

SUPPLEMENTARY DATA

**Supplementary Table 2. Association of type 2 diabetes genetic risk score with baseline clinical type 2 diabetes, socio-demographic, clinical and behavioral modifiable risk factors by ethnicity in the Third National Health and Nutrition Examination Survey DNA Bank (NHANES III, 1991-1994) accounting for sampling weights and complex survey design**

|                                                             | All ethnicities<br>(n = 6,501)       |             |       | NHW<br>(N=2,538)         |             |      | NHB<br>(N=1,979)         |             |      | MA<br>(N=1,994)         |             |      |
|-------------------------------------------------------------|--------------------------------------|-------------|-------|--------------------------|-------------|------|--------------------------|-------------|------|-------------------------|-------------|------|
|                                                             | OR                                   | 95%CI       | P     | OR                       | 95%CI       | P    | OR                       | 95%CI       | P    | OR                      | 95%CI       | P    |
| <i>Categorical clinical risk factors</i>                    |                                      |             |       |                          |             |      |                          |             |      |                         |             |      |
| <b>T2D</b>                                                  | 1.05                                 | (1.02-1.08) | 0.003 | 1.05                     | (1.01-1.10) | 0.01 | 0.99                     | (0.95-1.03) | 0.71 | 1.05                    | (1.02-1.09) | 0.01 |
| <b>T2D Family history</b>                                   | 1.03                                 | (1.01-1.06) | 0.003 | 1.04                     | (1.01-1.07) | 0.02 | 1.02                     | (1.00-1.05) | 0.05 | 1.01                    | (0.98-1.04) | 0.62 |
| <b>Hypertension</b>                                         | 0.99                                 | (0.97-1.02) | 0.70  | 0.99                     | (0.96-1.03) | 0.64 | 1.00                     | (0.97-1.04) | 0.85 | 0.99                    | (0.96-1.02) | 0.41 |
| <i>Categorical socio-demographic and behavioral factors</i> |                                      |             |       |                          |             |      |                          |             |      |                         |             |      |
| <b>Sex</b>                                                  | 1.00                                 | (0.98-1.02) | 0.70  | 1.00                     | (0.98-1.02) | 0.84 | 0.99                     | (0.97-1.01) | 0.37 | 0.98                    | (0.95-1.00) | 0.10 |
| <b>Physical Activity</b>                                    |                                      |             |       |                          |             |      |                          |             |      |                         |             |      |
| 1-5 times/week vs. Never                                    | 1.00                                 | (0.97-1.02) | 0.67  | 1.00                     | (0.97-1.03) | 0.89 | 0.99                     | (0.95-1.03) | 0.67 | 1.00                    | (0.97-1.04) | 0.82 |
| ≥ 5 times/week vs. Never                                    | 0.98                                 | (0.96-1.00) | 0.08  | 0.98                     | (0.96-1.01) | 0.20 | 0.97                     | (0.92-1.02) | 0.20 | 0.98                    | (0.95-1.01) | 0.17 |
| <b>Smoking</b>                                              |                                      |             |       |                          |             |      |                          |             |      |                         |             |      |
| Former vs. Never                                            | 1.01                                 | (0.98-1.04) | 0.62  | 1.01                     | (0.98-1.05) | 0.36 | 0.96                     | (0.91-1.01) | 0.10 | 1.02                    | (0.99-1.05) | 0.27 |
| Current vs. Never                                           | 1.00                                 | (0.98-1.03) | 0.78  | 1.01                     | (0.98-1.04) | 0.73 | 0.97                     | (0.94-1.00) | 0.06 | 1.03                    | (1.00-1.06) | 0.02 |
| <b>Educational attainment</b>                               |                                      |             |       |                          |             |      |                          |             |      |                         |             |      |
| 12 years vs. < 12 years                                     | 0.99                                 | (0.97-1.01) | 0.25  | 0.99                     | (0.97-1.02) | 0.59 | 1.00                     | (0.97-1.02) | 0.71 | 1.01                    | (0.98-1.04) | 0.65 |
| >12 years vs. < 12 years                                    | 0.98                                 | (0.96-1.01) | 0.13  | 0.99                     | (0.96-1.02) | 0.43 | 1.02                     | (0.98-1.05) | 0.44 | 0.99                    | (0.95-1.04) | 0.74 |
| <b>Alcohol consumption</b>                                  |                                      |             |       |                          |             |      |                          |             |      |                         |             |      |
| 1-3 drinks/week                                             | 0.98                                 | (0.95-1.01) | 0.19  | 0.98                     | (0.95-1.02) | 0.28 | 0.99                     | (0.96-1.02) | 0.38 | 0.99                    | (0.95-1.04) | 0.75 |
| >3 drinks/week                                              | 1.00                                 | (0.99-1.01) | 0.88  | 1.00                     | (0.98-1.02) | 0.92 | 1.02                     | (0.99-1.05) | 0.31 | 0.98                    | (0.95-1.00) | 0.10 |
| <b>Insurance coverage</b>                                   | 0.96                                 | (0.93-1.00) | 0.03  | 0.97                     | (0.92-1.02) | 0.22 | 1.00                     | (0.97-1.02) | 0.75 | 0.99                    | (0.96-1.01) | 0.23 |
| <b>Insurance coverage adjusted for ethnicity*</b>           | 0.97                                 | (0.94-1.01) | 0.16  | -                        |             |      | -                        |             |      | -                       |             |      |
|                                                             | <b>All ethnicities<br/>(N=6,501)</b> |             |       | <b>NHW<br/>(N=2,538)</b> |             |      | <b>NHB<br/>(N=1,979)</b> |             |      | <b>MA<br/>(N=1,994)</b> |             |      |

SUPPLEMENTARY DATA

|                                                            | $\beta$ | 95%CI          | <i>P</i> | $\beta$ | 95%CI          | <i>P</i> | $\beta$ | 95%CI         | <i>P</i> | $\beta$ | 95%CI         | <i>P</i> |
|------------------------------------------------------------|---------|----------------|----------|---------|----------------|----------|---------|---------------|----------|---------|---------------|----------|
| <b>Continuous clinical risk factors</b>                    |         |                |          |         |                |          |         |               |          |         |               |          |
| <b>BMI (continuous) kgm<sup>-2</sup></b>                   | -0.05   | (-0.01, -0.08) | 0.02     | -0.06   | (-0.09, -0.02) | 0.01     | -0.07   | (-0.17, 0.03) | 0.18     | -0.01   | (-0.06, 0.04) | 0.67     |
| <b>Waist circumference, cm</b>                             | -0.15   | (-0.27, -0.03) | 0.02     | -0.18   | (-0.32, -0.04) | 0.02     | -0.17   | (-0.44, 0.08) | 0.19     | -0.03   | (-0.19, 0.13) | 0.71     |
| <b>Total cholesterol, mmol/L</b>                           | -0.00   | (-0.01, 0.00)  | 0.95     | -0.00   | (-0.01, 0.01)  | 0.81     | -0.00   | (-0.02, 0.02) | 0.96     | 0.01    | (0.00, 0.02)  | 0.03     |
| <b>HDL, mmol/L</b>                                         | -0.00   | (-0.00, 0.00)  | 0.84     | 0.00    | (-0.00, 0.00)  | 0.97     | 0.00    | (-0.00, 0.01) | 0.11     | 0.00    | (-0.00, 0.00) | 0.97     |
| <b>Continuous socio-demographic and behavioral factors</b> |         |                |          |         |                |          |         |               |          |         |               |          |
| <b>Age (years)</b>                                         | -0.05   | (-0.19, 0.10)  | 0.52     | -0.02   | (-0.21, 0.17)  | 0.84     | 0.17    | (-0.01, 0.34) | 0.05     | -0.03   | (-0.17, 0.11) | 0.64     |
| <b>Healthy Eating Index</b>                                | -0.04   | (-0.18, 0.10)  | 0.56     | -0.05   | (-0.22, 0.12)  | 0.57     | 0.02    | (-0.15, 0.18) | 0.85     | 0.02    | (-0.15, 0.19) | 0.82     |

All models were adjusted for age and sex; NHW: Non-Hispanic Whites; NHB: Non-Hispanic Blacks; MA: Mexican Americans. OR: Odds Ratio; 95%CI: 95 percent confidence interval; BMI: body-mass-index; HDL: High-Density Lipoprotein cholesterol;  $\beta$ :  $\beta$  coefficient

SUPPLEMENTARY DATA

**Supplementary Table 3. Association between T2D with mortality risk by ethnicity in the Third National health and Nutrition Examination Survey DNA Bank (NHANES III, 1991-1994) accounting for sampling weights and complex survey design**

| Model                 | Variable   | All ethnicities<br>(N=6,501) |             |          | NHW<br>(N=2,538) |             |          | NHB<br>(N=1,979) |             |          | MA<br>(N=1,994) |             |          |
|-----------------------|------------|------------------------------|-------------|----------|------------------|-------------|----------|------------------|-------------|----------|-----------------|-------------|----------|
|                       |            | OR                           | 95%CI       | <i>P</i> | OR               | 95%CI       | <i>P</i> | OR               | 95%CI       | <i>P</i> | OR              | 95%CI       | <i>P</i> |
| <b>BMI-adjusted</b>   | <b>T2D</b> | 1.90                         | (1.26-2.86) | 0.002    | 1.97             | (1.19-3.27) | 0.01     | 1.80             | (1.32-2.45) | 0.002    | 1.82            | (1.20-2.77) | 0.01     |
| <b>Fully-adjusted</b> | <b>T2D</b> | 1.73                         | (1.17-2.55) | 0.006    | 1.77             | (1.11-2.83) | 0.02     | 1.82             | (1.27-2.62) | 0.001    | 1.62            | (1.02-2.58) | 0.04     |

All models were adjusted for age, sex and ethnicity. Fully-adjusted model additionally included BMI, family history, educational attainment, insurance coverage, physical activity, health eating index, smoking, alcohol consumption, total cholesterol, high density lipoprotein cholesterol, waist circumference, and hypertension with multiple imputation for missing values. T2D: type 2 diabetes; NHW: Non-Hispanic Whites; NHB: Non-Hispanic Blacks; MA: Mexican Americans. OR: Odds Ratio; 95%CI: 95 percent confidence interval

SUPPLEMENTARY DATA

**Supplementary Table 4. Estimated mortality risk per weighted allele by ethnicity adjusting for body-mass-index and type 2 diabetes status at baseline in the Third National health and Nutrition Examination Survey DNA Bank (NHANES III, 1991-1994) accounting for sampling weights and complex survey design**

| Model                               | Variable            | All ethnicities<br>(N=6,501) |             |          | NHW<br>(N=2,528) |             |          | NHB<br>(N=1,979) |             |          | MA<br>(N=1,994) |             |          |
|-------------------------------------|---------------------|------------------------------|-------------|----------|------------------|-------------|----------|------------------|-------------|----------|-----------------|-------------|----------|
|                                     |                     | OR                           | 95%CI       | <i>P</i> | OR               | 95%CI       | <i>P</i> | OR               | 95%CI       | <i>P</i> | OR              | 95%CI       | <i>P</i> |
| <b>Adjusted for BMI</b>             | <b>Weighted GRS</b> | 1.04                         | (1.00-1.07) | 0.05     | 1.04             | (1.00-1.09) | 0.08     | 1.04             | (1.01-1.06) | 0.002    | 0.95            | (0.90-1.01) | 0.07     |
| <b>Adjusted for BMI and T2D</b>     | <b>Weighted GRS</b> | 1.03                         | (1.00-1.07) | 0.08     | 1.04             | (0.99-1.08) | 0.11     | 1.04             | (1.01-1.06) | 0.002    | 0.95            | (0.90-1.00) | 0.04     |
| <b>Fully adjusted including T2D</b> | <b>Weighted GRS</b> | 1.04                         | (1.00-1.08) | 0.04     | 1.05             | (1.00-1.10) | 0.05     | 1.03             | (1.00-1.06) | 0.05     | 0.95            | (0.89-1.01) | 0.10     |

All models were adjusted for age, sex and ethnicity. Fully-adjusted model additionally included T2D, family history, educational attainment, insurance coverage, physical activity, health eating index, smoking, alcohol consumption, total cholesterol, high density lipoprotein cholesterol, waist circumference, and hypertension among 5,144 participants with complete data. NHW: Non-Hispanic Whites; NHB: Non-Hispanic Blacks; MA: Mexican Americans. OR: Odds Ratio; 95%CI: 95 percent confidence interval; BMI: body-mass-index. T2D: type 2 diabetes

SUPPLEMENTARY DATA

**Supplementary Table 5. Estimated mortality risk per weighted type 2 diabetes risk allele by ethnicity in using Cox regression the Third National health and Nutrition Examination Survey DNA Bank (NHANES III, 1991-1994) accounting for sampling weights and complex survey design**

| Model                   | Variable            | All ethnicities<br>(N=6,501) |                    |             | NHW<br>(N=2,528) |                    |             | NHB<br>(N=1,979) |                    |               | MA<br>(N=1,994) |             |          |
|-------------------------|---------------------|------------------------------|--------------------|-------------|------------------|--------------------|-------------|------------------|--------------------|---------------|-----------------|-------------|----------|
|                         |                     | HR                           | 95%CI              | <i>P</i>    | OR               | 95%CI              | <i>P</i>    | OR               | 95%CI              | <i>P</i>      | OR              | 95%CI       | <i>P</i> |
| <b>Adjusted for BMI</b> | <b>Weighted GRS</b> | <b>1.03</b>                  | <b>(1.00-1.05)</b> | <b>0.04</b> | <b>1.03</b>      | <b>(1.00-1.06)</b> | <b>0.05</b> | <b>1.03</b>      | <b>(1.02-1.05)</b> | <b>0.0004</b> | 0.95            | (0.91-1.00) | 0.05     |
| <b>Fully-adjusted</b>   | <b>Weighted GRS</b> | <b>1.03</b>                  | <b>(1.00-1.05)</b> | <b>0.03</b> | <b>1.03</b>      | <b>(1.00-1.06)</b> | <b>0.04</b> | <b>1.03</b>      | <b>(1.00-1.06)</b> | <b>0.04</b>   | 0.96            | (0.91-1.01) | 0.11     |

Bolded effect estimates had  $P < 0.05$ . N/A: All models were adjusted for age, sex and ethnicity. Fully-adjusted model additionally included family history, educational attainment, insurance coverage, physical activity, health eating index, smoking, alcohol consumption, total cholesterol, high density lipoprotein cholesterol, waist circumference, and hypertension among 5,144 participants with complete data. NHW: Non-Hispanic Whites; NHB: Non-Hispanic Blacks; MA: Mexican Americans. OR: Odds Ratio; 95%CI: 95 percent confidence interval; BMI: body-mass-index.

SUPPLEMENTARY DATA

**Supplementary Table 6. Estimated mortality risk per weighted and unweighted type 2 diabetes risk allele by ethnicity in the Third National Health and Nutrition Examination Survey DNA Bank (NHANES III, 1991-1994) accounting for sampling weights and complex survey design**

| Model                   | Variable              | All ethnicities<br>(N=6,501) |             |      | NHW<br>(N=2,528) |             |      | NHB<br>(N=1,979) |             |       | MA<br>(N=1,994) |             |      |
|-------------------------|-----------------------|------------------------------|-------------|------|------------------|-------------|------|------------------|-------------|-------|-----------------|-------------|------|
|                         |                       | OR                           | 95%CI       | P    | OR               | 95%CI       | P    | OR               | 95%CI       | P     | OR              | 95%CI       | P    |
| <b>Adjusted for BMI</b> | <b>Weighted GRS</b>   | 1.04                         | (1.00-1.07) | 0.05 | 1.04             | (1.00-1.09) | 0.08 | 1.04             | (1.01-1.06) | 0.002 | 0.95            | (0.90-1.01) | 0.07 |
| <b>Fully-adjusted</b>   | <b>Weighted GRS</b>   | 1.04                         | (1.00-1.08) | 0.05 | 1.04             | (1.00-1.10) | 0.06 | 1.03             | (1.01-1.06) | 0.007 | 0.95            | (0.89-1.01) | 0.10 |
| <b>Adjusted for BMI</b> | <b>Unweighted GRS</b> | 1.04                         | (0.99-1.08) | 0.09 | 1.04             | (0.99-1.10) | 0.09 | 1.02             | (0.99-1.05) | 0.12  | 0.96            | (0.91-1.02) | 0.21 |
| <b>Fully-adjusted</b>   | <b>Unweighted GRS</b> | 1.04                         | (0.99-1.09) | 0.09 | 1.05             | (0.99-1.12) | 0.07 | 1.02             | (1.00-1.04) | 0.11  | 0.97            | (0.91-1.03) | 0.26 |

All models were adjusted for age, sex and ethnicity. Fully-adjusted model additionally included BMI, family history, educational attainment, insurance coverage, physical activity, health eating index, smoking, alcohol consumption, total cholesterol, high density lipoprotein cholesterol, waist circumference, and hypertension with multiple imputation for missing values. GRS: Genetic risk score; NHW: Non-Hispanic Whites; NHB: Non-Hispanic Blacks; MA: Mexican Americans. OR: Odds Ratio; 95%CI: 95 percent confidence interval

SUPPLEMENTARY DATA

**Supplementary Table 7. Interaction for Body-mass-index with type 2 diabetes genetic risk score for mortality risk by ethnicity in the Third National health and Nutrition Examination Survey DNA Bank (NHANES III, 1991-1994) accounting for sampling weights and complex survey design**

| BMI                          | GRS          | All ethnicities      | NHW                  | NHB                  | MA                    |
|------------------------------|--------------|----------------------|----------------------|----------------------|-----------------------|
| Continuous                   | continuous   | <i>P</i> =0.94       | <i>P</i> =0.99       | <i>P</i> =0.60       | <b><i>P</i>=0.03</b>  |
| overweight vs. normal weight | continuous   | <i>P</i> =0.51       | <i>P</i> =0.53       | <i>P</i> =0.99       | <i>P</i> =0.44        |
| obese vs. normal weight      | continuous   | <b><i>P</i>=0.07</b> | <b><i>P</i>=0.07</b> | <i>P</i> =0.95       | <i>P</i> =0.10        |
| continuous                   | High vs. low | <i>P</i> =0.46       | <i>P</i> =0.53       | <b><i>P</i>=0.09</b> | <b><i>P</i>=0.01</b>  |
| overweight vs. normal weight | high vs. low | <i>P</i> =0.35       | <i>P</i> =0.24       | <i>P</i> =0.37       | <i>P</i> =0.12        |
| obese vs. normal weight      | High vs. low | <i>P</i> =0.25       | <i>P</i> =0.24       | <i>P</i> =0.27       | <b><i>P</i>=0.002</b> |

All models were adjusted for age, sex and ethnicity; GRS: Genetic risk score NHW: Non-Hispanic Whites; NHB: Non-Hispanic Blacks; MA: Mexican Americans. OR: Odds Ratio; 95%CI: 95 percent confidence interval; Body-mass-index; BMI (categories) is a three-level variable, normal weight (<25 kgm<sup>-2</sup>), overweight (25-30 kgm<sup>-2</sup>), and Obese (BMI >30 kgm<sup>-2</sup>). GRS (categories) is a two-level variable, high GRS (≥ median ethnic-specific GRS) and low (< ethnic-specific GRS). Interaction P value <0.1 are in bold.



SUPPLEMENTARY DATA

**Supplementary Table 8. Estimated mortality risk per type 2 diabetes risk allele within BMI categories (normal weight, overweight and obese) by ethnicity in the Third National health and Nutrition Examination Survey DNA Bank (NHANES III, 1991-1994) accounting for sampling weights and complex survey design**

| BMI category                                                                                                                           | Model                    | Variable        | All ethnicities<br>(N=6,501) |             | NHW<br>(N=2,538) |             | NHB<br>(N=1,979) |             | MA<br>(N=1,994) |             |
|----------------------------------------------------------------------------------------------------------------------------------------|--------------------------|-----------------|------------------------------|-------------|------------------|-------------|------------------|-------------|-----------------|-------------|
|                                                                                                                                        |                          |                 | OR                           | 95%CI       | OR               | 95%CI       | OR               | 95%CI       | OR              | 95%CI       |
| Normal weight<br>(BMI <25 kgm <sup>-2</sup> )<br>Overweight<br>(BMI 25-30 kgm <sup>-2</sup> )<br>Obese<br>(BMI >30 kgm <sup>-2</sup> ) | Adjusted for age and sex | Weighted<br>GRS | 1.02                         | (0.96-1.07) | 1.02             | (0.95-1.09) | 1.04             | (0.98-1.11) | 0.91            | (0.82-1.00) |
|                                                                                                                                        |                          | Weighted<br>GRS | 1.03                         | (0.99-1.07) | 1.03             | (0.99-1.09) | 1.04             | (0.97-1.12) | 0.94            | (0.87-1.01) |
|                                                                                                                                        |                          | Weighted<br>GRS | 1.06                         | (1.02-1.11) | 1.07             | (1.02-1.12) | 1.04             | (0.98-1.10) | 1.00            | (0.93-1.08) |
| Normal weight<br>(BMI <25 kgm <sup>-2</sup> )<br>Overweight<br>(BMI 25-30 kgm <sup>-2</sup> )<br>Obese<br>(BMI >30 kgm <sup>-2</sup> ) | Fully-adjusted           | Weighted<br>GRS | 1.00                         | (0.94-1.06) | 1.00             | (0.93-1.09) | 1.04             | (0.99-1.09) | 0.89            | (0.81-0.98) |
|                                                                                                                                        |                          | Weighted<br>GRS | 1.04                         | (0.99-1.10) | 1.05             | (0.98-1.13) | 1.03             | (0.97-1.09) | 0.95            | (0.88-1.03) |
|                                                                                                                                        |                          | Weighted<br>GRS | 1.08                         | (1.02-1.14) | 1.09             | (1.02-1.17) | 1.04             | (0.98-1.11) | 1.00            | (0.91-1.08) |

All models were adjusted for age, sex and ethnicity. Fully-adjusted model additionally included family history, educational attainment, insurance coverage, physical activity, health eating index, smoking, alcohol consumption, total cholesterol, high density lipoprotein cholesterol, waist circumference, and hypertension with multiple imputation for missing values. NHW: Non-Hispanic Whites; NHB: Non-Hispanic Blacks; MA: Mexican Americans. OR: Odds Ratio; 95%CI: 95 percent confidence interval; BMI: body-mass-index. Part of these results were displayed in Figure 1 in the main manuscript.

SUPPLEMENTARY DATA

**Supplementary Table 9. Estimated mortality risk per type 2 diabetes risk allele within BMI categories (normal weight, overweight and obese) by ethnicity using Cox regression in the Third National health and Nutrition Examination Survey DNA Bank (NHANES III, 1991-1994) accounting for sampling weights and complex survey design**

| BMI category                                                                                                                           | Model                       | Variable        | All ethnicities<br>(N=6,501) |                    | NHW<br>(N=2,538) |                    | NHB<br>(N=1,979) |             | MA<br>(N=1,994) |             |
|----------------------------------------------------------------------------------------------------------------------------------------|-----------------------------|-----------------|------------------------------|--------------------|------------------|--------------------|------------------|-------------|-----------------|-------------|
|                                                                                                                                        |                             |                 | OR                           | 95%CI              | OR               | 95%CI              | OR               | 95%CI       | OR              | 95%CI       |
| Normal weight<br>(BMI <25 kgm <sup>-2</sup> )<br>Overweight<br>(BMI 25-30 kgm <sup>-2</sup> )<br>Obese<br>(BMI >30 kgm <sup>-2</sup> ) | Adjusted for<br>age and sex | Weighted<br>GRS | 1.01                         | (0.98-1.04)        | 1.01             | (0.98-1.04)        | 1.02             | (0.97-1.08) | 0.92            | (0.85-0.99) |
|                                                                                                                                        |                             | Weighted<br>GRS | <b>1.04</b>                  | <b>(1.01-1.07)</b> | <b>1.04</b>      | <b>(1.01-1.08)</b> | 1.03             | (0.99-1.07) | 0.95            | (0.90-1.01) |
|                                                                                                                                        |                             | Weighted<br>GRS | <b>1.04</b>                  | <b>(1.01-1.07)</b> | <b>1.04</b>      | <b>(1.00-1.08)</b> | 1.04             | (1.00-1.08) | 0.99            | (0.93-1.06) |
| Normal weight<br>(BMI <25 kgm <sup>-2</sup> )<br>Overweight<br>(BMI 25-30 kgm <sup>-2</sup> )<br>Obese<br>(BMI >30 kgm <sup>-2</sup> ) | Fully-adjusted              | Weighted<br>GRS | 1.02                         | (0.98-1.05)        | 1.02             | (0.98-1.06)        | 1.03             | (0.98-1.09) | N/A             | N/A         |
|                                                                                                                                        |                             | Weighted<br>GRS | <b>1.04</b>                  | <b>(1.00-1.08)</b> | <b>1.05</b>      | <b>(1.00-1.09)</b> | 1.04             | (0.98-1.10) | 0.96            | (0.91-1.02) |
|                                                                                                                                        |                             | Weighted<br>GRS | 1.04                         | (0.99-1.08)        | 1.04             | (0.98-1.09)        | 1.04             | (0.99-1.09) | 1.00            | (0.91-1.10) |

Bolded effect estimates had P<0.05. All models were adjusted for age, sex and ethnicity. Fully-adjusted model additionally included family history, educational attainment, insurance coverage, physical activity, health eating index, smoking, alcohol consumption, total cholesterol, high density lipoprotein cholesterol, waist circumference, and hypertension among 5,144 participants with complete data. NHW: Non-Hispanic Whites; NHB: Non-Hispanic Blacks; MA: Mexican Americans. OR: Odds Ratio; 95%CI: 95 percent confidence interval; N/A: Given the low event rate among normal weight MA, the fully adjusted model could not be performed. BMI: body-mass-index. Normal weight: <25 kgm<sup>-2</sup>; Overweight: 25-30 kgm<sup>-2</sup>; Obese: BMI >30 kgm<sup>-2</sup>.

SUPPLEMENTARY DATA

**Supplementary Table 10. Association between BMI categories (overweight vs. normal weight, obese vs. normal weight) and mortality risk by ethnicity in the Third National health and Nutrition Examination Survey DNA Bank (NHANES III, 1991-1994) accounting for sampling weights and complex survey design**

| Model          | Variable              | All ethnicities<br>(N=6,501) |                    | NHW<br>(N=2,538) |             | NHB<br>(N=1,979) |             | MA<br>(N=1,994) |             |
|----------------|-----------------------|------------------------------|--------------------|------------------|-------------|------------------|-------------|-----------------|-------------|
|                |                       | OR                           | 95%CI              | OR               | 95%CI       | OR               | 95%CI       | OR              | 95%CI       |
| Unadjusted     | Overweight vs. normal | 0.84                         | (0.63-1.11)        | 0.82             | (0.59-1.15) | 0.78             | (0.51-1.18) | 1.02            | (0.72-1.14) |
|                | Obese vs. Normal      | <b>1.37</b>                  | <b>(1.04-1.81)</b> | 1.49             | (1.07-2.09) | 0.77             | (0.53-1.12) | 1.17            | (0.70-1.94) |
| Fully-adjusted | Overweight vs. normal | 0.82                         | (0.50-1.32)        | 0.78             | (0.44-1.38) | 0.73             | (0.41-1.31) | 0.89            | (0.54-1.45) |
|                | Obese vs. Normal      | 1.25                         | (0.58-2.72)        | 1.34             | (0.51-3.50) | 0.69             | (0.33-1.46) | 0.71            | (0.35-1.44) |

Bolded effect estimates had P<0.05. All models were adjusted for age, sex and ethnicity. Fully-adjusted model additionally included family history, educational attainment, insurance coverage, physical activity, health eating index, smoking, alcohol consumption, total cholesterol, high density lipoprotein cholesterol, waist circumference, and hypertension among 5,144 participants with complete data. NHW: Non-Hispanic Whites; NHB: Non-Hispanic Blacks; MA: Mexican Americans. OR: Odds Ratio; 95%CI: 95 percent confidence interval; Normal weight: <25 kgm<sup>-2</sup>; Overweight : 25-30 kgm<sup>-2</sup> ; Obese: BMI >30 kgm<sup>-2</sup>

SUPPLEMENTARY DATA

**Supplementary Table 11. Association between BMI categories (overweight vs. normal weight, obese vs. normal weight) and mortality within type 2 diabetes genetic risk groups by ethnicity in the Third National health and Nutrition Examination Survey DNA Bank (NHANES III, 1991-1994) accounting for sampling weights and complex survey design**

| Genetic risk | Model           | Variable                     | All ethnicities<br>(N=6,501) |             | NHW<br>(N=7,350) |                    | NHB<br>(N=1,979) |             | MA<br>(N=1,994) |                    |
|--------------|-----------------|------------------------------|------------------------------|-------------|------------------|--------------------|------------------|-------------|-----------------|--------------------|
|              |                 |                              | OR                           | 95%CI       | OR               | 95%CI              | OR               | 95%CI       | OR              | 95%CI              |
| High GRS     | Unadjusted      | Overweight vs. Normal weight | 0.85                         | (0.60-1.22) | 0.87             | (0.57-1.33)        | 0.67             | (0.37-1.23) | 1.51            | (0.86-2.65)        |
|              |                 | Obese vs. Normal weight      | 1.57                         | (0.99-2.50) | <b>1.84</b>      | <b>(1.04-3.25)</b> | 0.64             | (0.34-1.23) | <b>2.27</b>     | <b>(1.33-3.88)</b> |
| Low GRS      | Unadjusted      | Overweight vs. Normal weight | 0.77                         | (0.57-1.05) | 0.75             | (0.54-1.05)        | 0.90             | (0.55-1.48) | 0.81            | (0.54-1.23)        |
|              |                 | Obese vs. Normal weight      | 1.11                         | (0.77-1.61) | 1.19             | (0.77-1.83)        | 0.93             | (0.59-1.45) | 0.67            | (0.34-1.35)        |
| High GRS     | Fully adjusted* | Overweight vs. Normal weight | 0.85                         | (0.47-1.53) | 0.79             | (0.39-1.62)        | 0.74             | (0.35-1.53) | 0.99            | (0.55-1.78)        |
|              |                 | Obese vs. Normal weight      | 1.80                         | (0.54-6.00) | 1.97             | (0.42-9.32)        | 0.77             | (0.26-2.27) | 1.30            | (0.55-3.07)        |
| Low GRS      | Fully adjusted* | Overweight vs. Normal weight | 0.70                         | (0.44-1.13) | 0.68             | (0.37-1.23)        | 0.82             | (0.35-1.91) | 0.82            | (0.45-1.47)        |
|              |                 | Obese vs. Normal weight      | 0.74                         | (0.35-1.54) | 0.76             | (0.28-2.06)        | 0.61             | (0.20-1.88) | 0.46            | (0.18-1.22)        |

Bolded effect estimates had P<0.05. All models were adjusted for age, sex and ethnicity. Fully-adjusted model additionally included family history, educational attainment, insurance coverage, physical activity, health eating index, smoking, alcohol consumption, total cholesterol, high density lipoprotein cholesterol, waist circumference, and hypertension among 5,144 participants with complete data. NHW: Non-Hispanic Whites; NHB: Non-Hispanic Blacks; MA: Mexican Americans. OR: Odds Ratio; 95%CI: 95 percent confidence interval; BMI: body-mass-index. Normal weight: <25 kgm<sup>-2</sup>; Overweight: 25-30 kgm<sup>-2</sup>; Obese: BMI >30 kgm<sup>-2</sup>.

SUPPLEMENTARY DATA

**Supplementary Table 12. Association between BMI categories (overweight vs. normal weight, obese vs. normal weight) and mortality within type 2 diabetes genetic risk groups by ethnicity using Cox regression in the Third National health and Nutrition Examination Survey DNA Bank (NHANES III, 1991-1994) accounting for sampling weights and complex survey design**

| Genetic risk    | Model                 | Variable                            | All ethnicities<br>(N=6,501) |             | NHW<br>(N=7,350) |             | NHB<br>(N=1,979) |             | MA<br>(N=1,994) |                    |
|-----------------|-----------------------|-------------------------------------|------------------------------|-------------|------------------|-------------|------------------|-------------|-----------------|--------------------|
|                 |                       |                                     | OR                           | 95%CI       | OR               | 95%CI       | OR               | 95%CI       | OR              | 95%CI              |
| <b>High GRS</b> | <b>Unadjusted</b>     | <b>Overweight vs. Normal weight</b> | 0.99                         | (0.79-1.25) | 1.03             | (0.81-1.30) | 0.77             | (0.49-1.22) | 1.51            | (0.93-2.43)        |
|                 |                       | <b>Obese vs. Normal weight</b>      | 1.28                         | (0.96-1.69) | 1.35             | (0.97-1.88) | 0.80             | (0.50-1.28) | <b>2.05</b>     | <b>(1.31-3.19)</b> |
| <b>Low GRS</b>  | <b>Unadjusted</b>     | <b>Overweight vs. Normal weight</b> | 0.77                         | (0.61-0.96) | 0.74             | (0.58-0.96) | 0.88             | (0.61-1.28) | 0.93            | (0.67-1.28)        |
|                 |                       | <b>Obese vs. Normal weight</b>      | 1.06                         | (0.83-1.37) | 1.13             | (0.85-1.49) | 0.87             | (0.62-1.23) | 0.89            | (0.48-1.54)        |
| <b>High GRS</b> | <b>Fully adjusted</b> | <b>Overweight vs. Normal weight</b> | 1.05                         | (0.77-1.42) | 1.08             | (0.81-1.45) | 0.82             | (0.38-1.75) | 1.00            | (0.66-1.52)        |
|                 |                       | <b>Obese vs. Normal weight</b>      | 1.44                         | (0.80-2.61) | 1.51             | (0.80-2.82) | 0.95             | (0.32-2.84) | 1.25            | (0.62-2.51)        |
| <b>Low GRS</b>  | <b>Fully adjusted</b> | <b>Overweight vs. Normal weight</b> | 0.71                         | (0.53-0.95) | 0.70             | (0.49-0.98) | 0.84             | (0.42-1.66) | 0.82            | (0.50-1.34)        |
|                 |                       | <b>Obese vs. Normal weight</b>      | 0.84                         | (0.51-1.37) | 0.88             | (0.49-1.61) | 0.68             | (0.28-1.66) | 0.59            | (0.25-1.37)        |

Bolded effect estimates had P<0.05. N/A: All models were adjusted for age, sex and ethnicity. Fully-adjusted model additionally included family history, educational attainment, insurance coverage, physical activity, health eating index, smoking, alcohol consumption, total cholesterol, high density lipoprotein cholesterol, waist circumference, and hypertension among 5,144 participants with complete data. NHW: Non-Hispanic Whites; NHB: Non-Hispanic Blacks; MA: Mexican Americans. OR: Odds Ratio; 95%CI: 95 percent confidence interval; BMI: body-mass-index. Normal weight: <25 kgm<sup>-2</sup>; Overweight: 25-30 kgm<sup>-2</sup>; Obese: BMI >30 kgm<sup>-2</sup>.

SUPPLEMENTARY DATA

**Supplementary Table 13. Estimated mortality risk per type 2 diabetes risk allele by ethnicity among participants aged  $\geq$  45 years in the Third National health and Nutrition Examination Survey DNA Bank (NHANES III, 1991-1994) accounting for sampling weights and complex survey design**

| Model                 | Variable            | All ethnicities<br>(N=6,501) |             |          | NHW<br>(N=2,538) |             |          | NHB<br>(N=1,979) |             |          | MA<br>(N=1,994) |             |          |
|-----------------------|---------------------|------------------------------|-------------|----------|------------------|-------------|----------|------------------|-------------|----------|-----------------|-------------|----------|
|                       |                     | OR                           | 95%CI       | <i>P</i> | OR               | 95%CI       | <i>P</i> | OR               | 95%CI       | <i>P</i> | OR              | 95%CI       | <i>P</i> |
| <b>BMI-adjusted</b>   | <b>Weighted GRS</b> | 1.04                         | (1.01-1.08) | 0.02     | 1.05             | (1.01-1.10) | 0.02     | 1.02             | (0.98-1.07) | 0.31     | 0.94            | (0.87-1.02) | 0.14     |
| <b>Fully-adjusted</b> | <b>Weighted GRS</b> | 1.05                         | (1.00-1.05) | 0.03     | 1.06             | (1.01-1.11) | 0.02     | 1.02             | (0.97-1.06) | 0.47     | 0.94            | (0.87-1.02) | 0.12     |

All models were adjusted for age, sex and ethnicity. Fully-adjusted model additionally included BMI, family history, educational attainment, insurance coverage, physical activity, health eating index, smoking, alcohol consumption, total cholesterol, high density lipoprotein cholesterol, waist circumference, and hypertension with multiple imputation for missing values. GRS: Genetic risk score
